# Supplementary material
Source: Springer Nature journal article supplement (https://www.springermedizin.de/resource/supplementary/12936_2011_1917_MOESM6_ESM.pdf/9542048)
Supplement: MOESM6 [file 9542048]

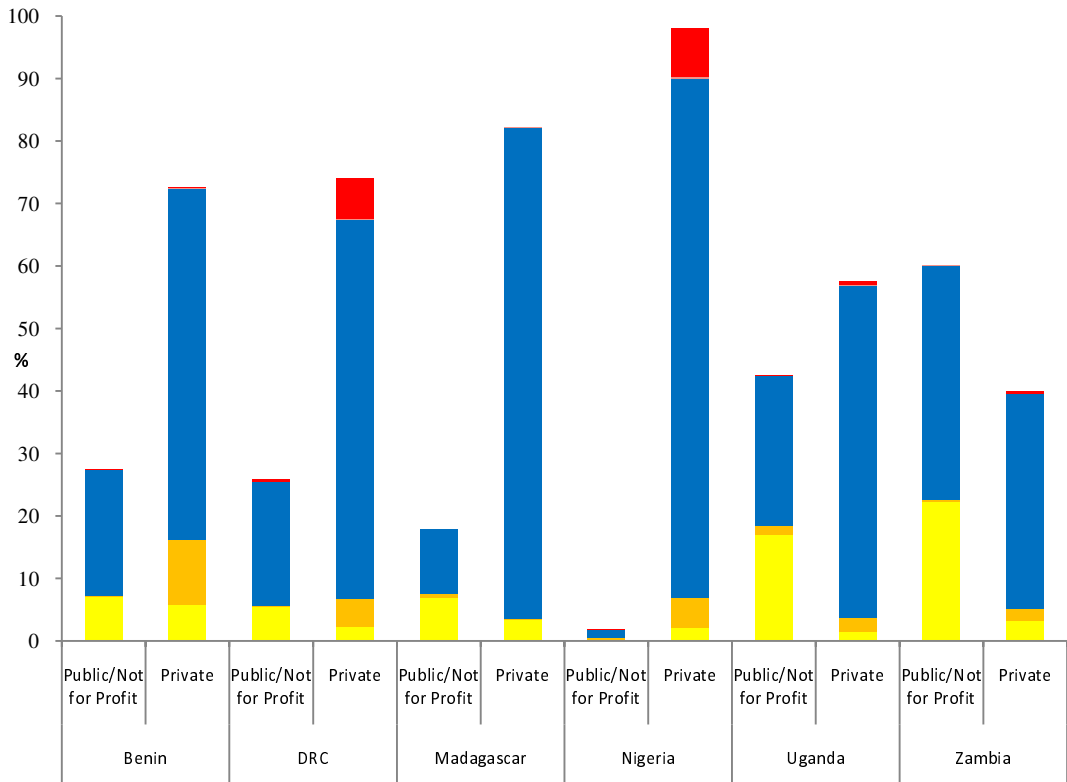

■ Oral artemisinin monotherapy

■ Non-oral artemisinin monotherapy

■ Non-artemisinin therapy

■ Other ACT

■ Quality-assured ACT
